# Supplementary material for: Phenological strategies of Byrsonima coccolobifolia (Malpighiaceae) and its associated galling Cecidomyiidae
Source: Research Square preprint supplement (doi:10.21203/rs.3.rs-8743461/v1), 2026-02-09
Supplement: Supplementary file 1 [file d3e3715441d4400d9eb214a3.docx]

**Supplementary material**

**Supplementary a** - Temporal variation of the variables measured during the eighteen months of the study. A - Synchronism of vegetative and reproductive phenophases among the ten individuals of *Byrsonima coccolobifolia* Kunth (Malpighiaceae) monitored between September 2018 to February 2020 evaluated at relative frequency index. B - Synchronism of gall phenophases among the ten individuals of *Byrsonima coccolobifolia* monitored between September 2018 to February 2020 evaluated at relative frequency index.

**
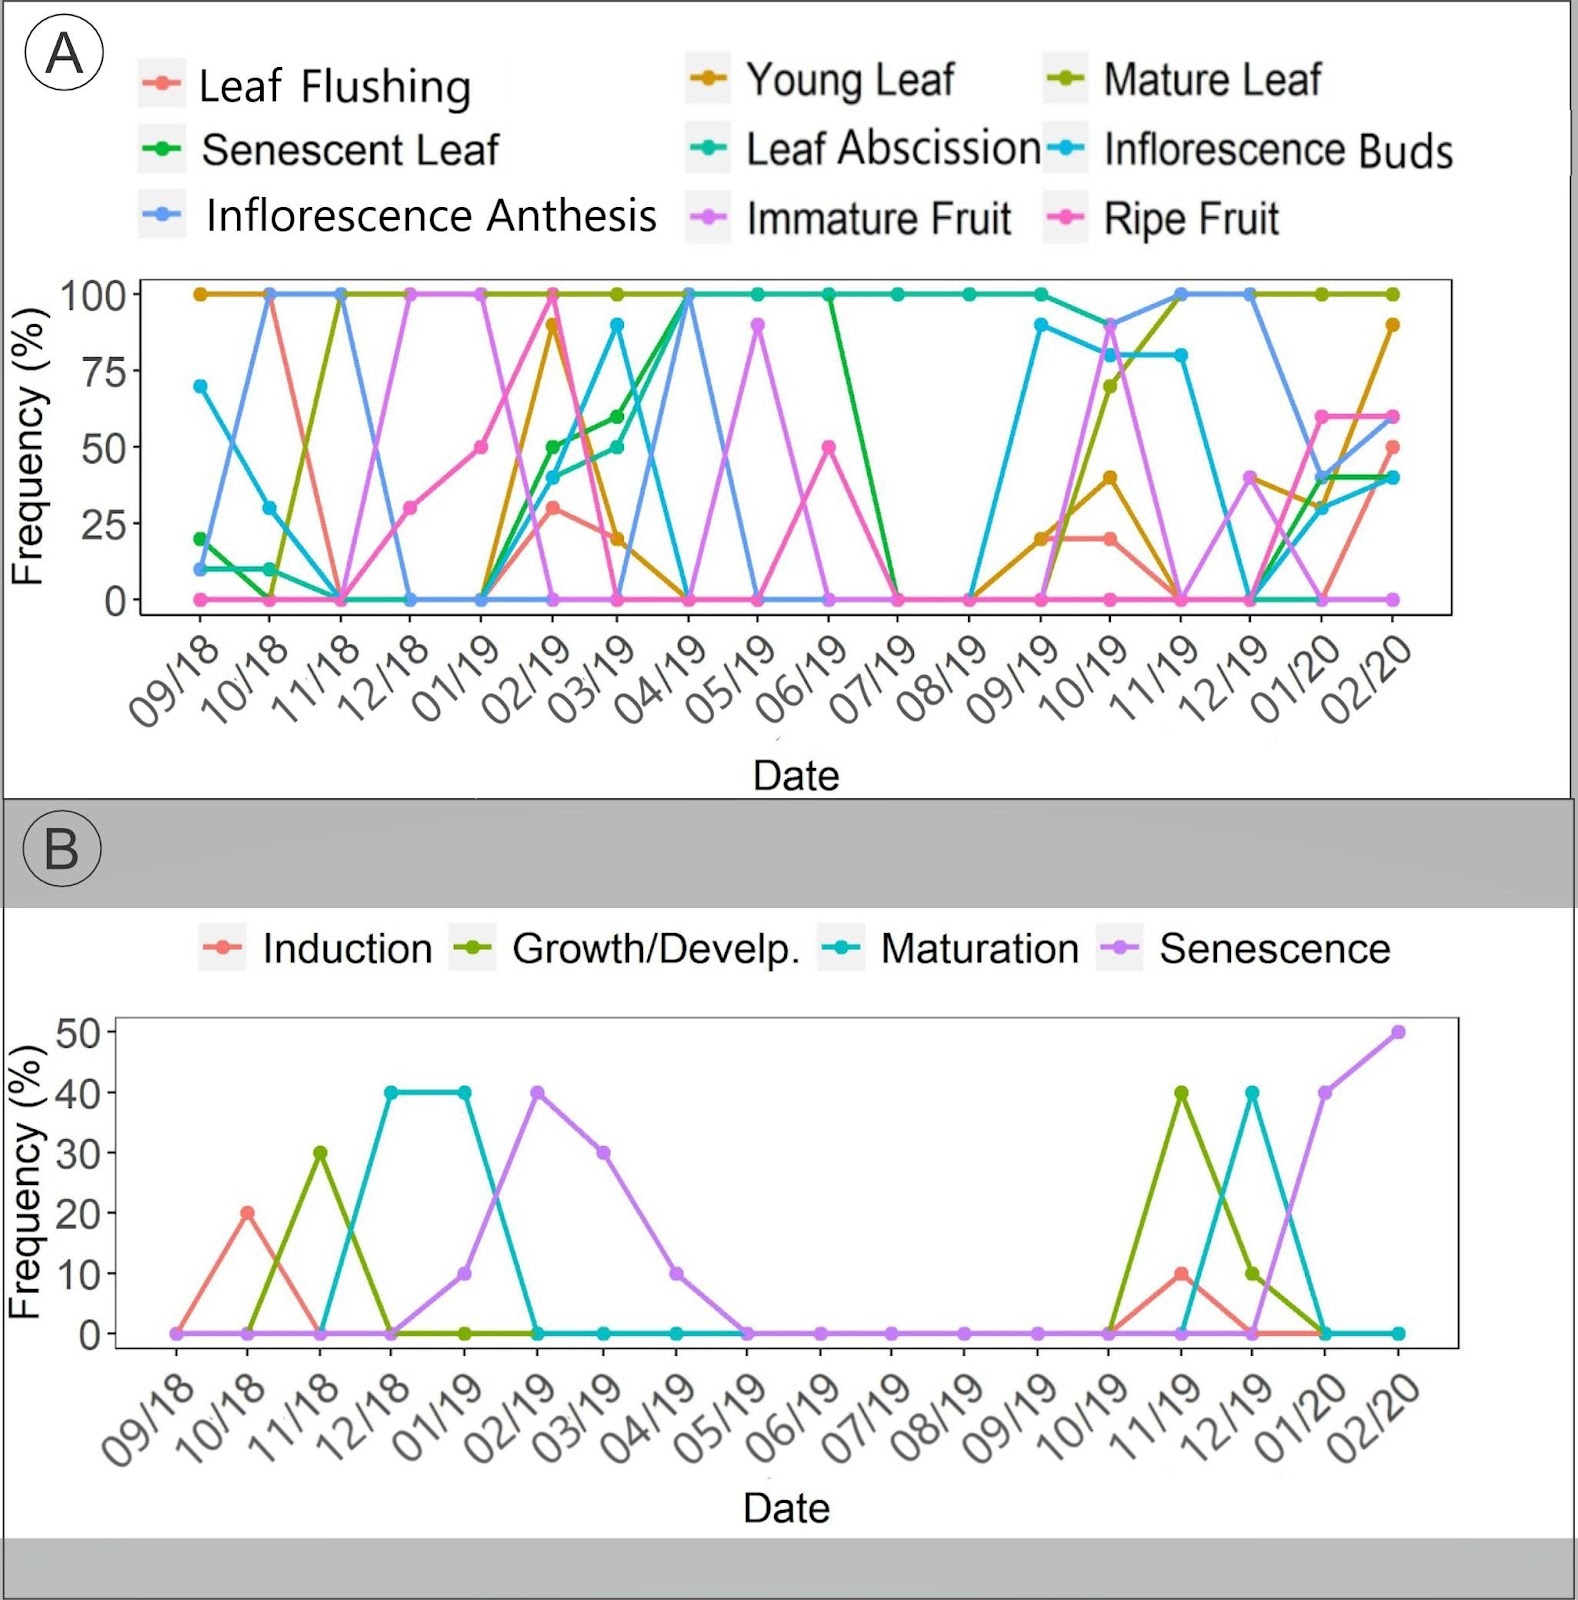
**

**Supplementary b** - Illustrative plots of the host plant phenophases for the significant non-parametric Kendall’s correlations followed by their respective p-values. Strong correlations are above 0.7 and correlations between 0.4 and 0.69 are considered moderate. Correlations near 1, indicate a high synchrony, values near -1.

**
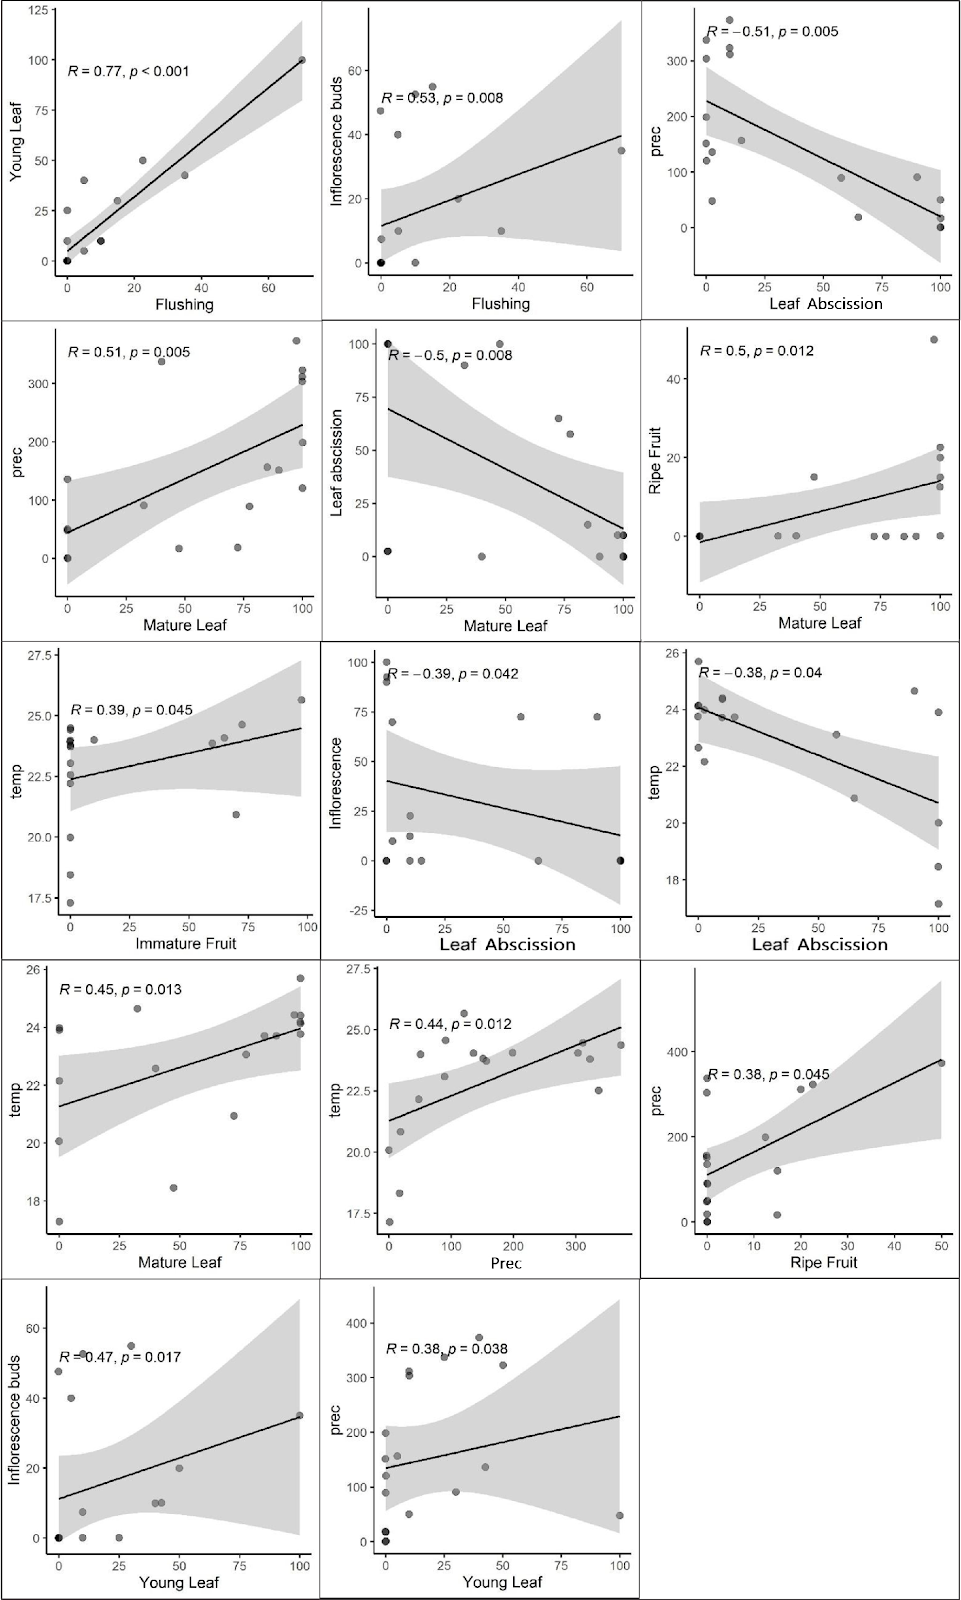
**

**Supplementary c** - Illustrative plots of the gall phenophases for the significant non-parametric Kendall’s correlations followed by their respective p-values. Strong correlations are above 0.7 and correlations between 0.4 and 0.69 are considered moderate. Correlations near 1, indicate a high synchrony, values near -1.

**
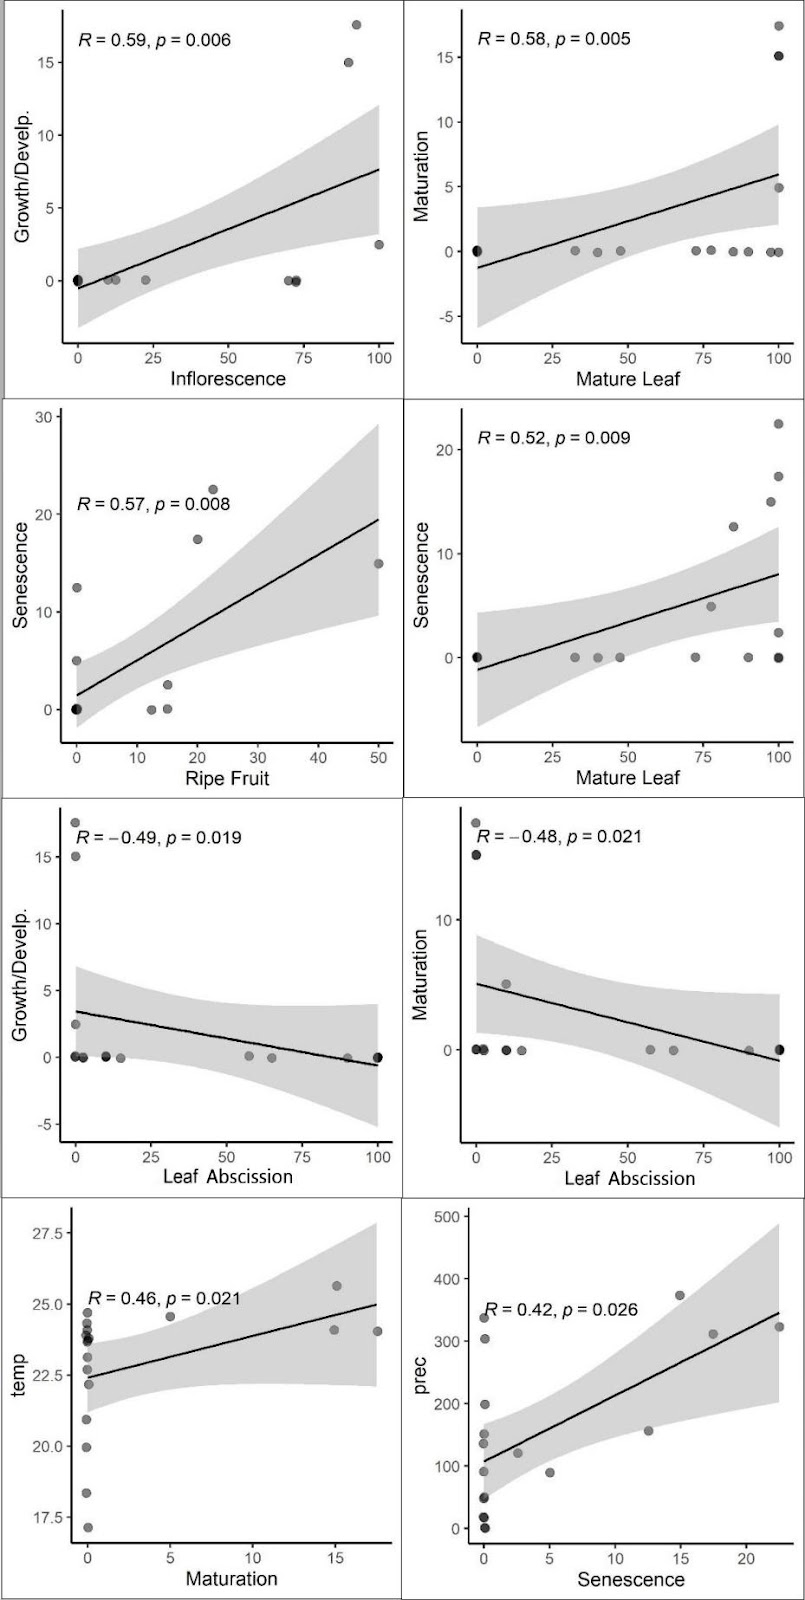
**
